# Supplementary material for: Computational design of Janus polymersomes with controllable fission from double emulsions
Source: Royal Society of Chemistry journal article supplement (doi:10.1039/d0cp04561f), 2020-01-01
Supplement: d0cp04561f1.pdf [file d0cp04561f1.pdf]

## Supporting information

# Computational Design of Janus Polymersomes with Controllable Fission from Double Emulsions

*Shanlong Li,<sup>a</sup> Chunyang Yu<sup>\*a</sup>, Yongfeng Zhou<sup>\*a</sup>*

<sup>a</sup>School of Chemistry & Chemical Engineering, Frontiers Science Center for Transformative Molecules, Shanghai Key Laboratory of Electrical Insulation and Thermal Aging, Shanghai Jiao Tong University, Shanghai, China

|             |                                                                      |            |
|-------------|----------------------------------------------------------------------|------------|
| <b>S1.</b>  | <b>DPD fundamentals.</b> .....                                       | <b>S3</b>  |
| <b>S2.</b>  | <b>Finite size effect.</b> .....                                     | <b>S5</b>  |
| <b>S3.</b>  | <b>The stability of double emulsions.</b> .....                      | <b>S6</b>  |
| <b>S4.</b>  | <b>Dewetting of the double emulsion.</b> .....                       | <b>S7</b>  |
| <b>S5.</b>  | <b>Calculation of the degree of phase separation.</b> .....          | <b>S8</b>  |
| <b>S6.</b>  | <b>Co-assembly of AB/AC blends through double emulsion.</b> .....    | <b>S9</b>  |
| <b>S7.</b>  | <b>Co-assembly of AB/AC/BC blends through double emulsion.</b> ..... | <b>S10</b> |
| <b>S8.</b>  | <b>Effect of the number of BC.</b> .....                             | <b>S12</b> |
| <b>S9.</b>  | <b>Mean-square displacement curves of polymers.</b> .....            | <b>S13</b> |
| <b>S10.</b> | <b>References.</b> .....                                             | <b>S14</b> |

## S1. DPD fundamentals.

In DPD method, like molecular dynamics, the motion of all the DPD beads obeys Newton's equation of motion.

$$\frac{dr_i}{dt} = v_i, \quad \frac{dv_i}{dt} = f_i/m_i \quad (S1)$$

where  $r_i$ ,  $v_i$  and  $m_i$  denote the position vector, velocity vector and mass of beads respectively, and  $f_i$  is the force acting on bead  $i$ . The force  $F_{ij}$  exerted on bead  $i$  by bead  $j$  is consisted of a conservative force  $F_{ij}^C$ , a dissipative force  $F_{ij}^D$  and a random force  $F_{ij}^R$ . Thus, the total force  $f_i$  is given by

$$f_i = \sum_{j \neq i} (F_{ij}^C + F_{ij}^D + F_{ij}^R) \quad (S2)$$

where the sum runs over all other beads within the cutoff radius  $r_c$ . And the conservative force  $F_{ij}^C$ , dissipative force  $F_{ij}^D$  and random force  $F_{ij}^R$  are given by

$$F_{ij}^C = \begin{cases} a_{ij}(r_c - r_{ij})e_{ij} & r_{ij} \leq r_c \\ 0 & r_{ij} > r_c \end{cases} \quad (S3)$$

$$F_{ij}^D = -\gamma\omega^D(r_{ij})(e_{ij} \cdot v_{ij})e_{ij} \quad (S4)$$

$$F_{ij}^R = \sigma\omega^R(r_{ij})\theta_{ij}e_{ij} \quad (S5)$$

where  $a_{ij}$  is a constant that describes the maximum repulsion between two interacting beads.  $r_{ij}$  is the distance between beads  $i$  and  $j$ .  $e_{ij} = r_{ij}/r_{ij}$ ,  $v_{ij} = v_i - v_j$ ,  $v_i$  and  $v_j$  are the velocities of beads  $i$  and  $j$ , respectively.  $\gamma$  and  $\sigma$  are the amplitudes of dissipative and random forces, respectively.  $\theta_{ij}$  is a randomly fluctuating variable.  $\omega^D$  and  $\omega^R$  are r-dependent weight functions for dissipative and random forces, respectively. According to the fluctuation-dissipation theorem,  $\omega_{ij}^D(r) = [\omega_{ij}^R(r)]^2$  and  $\sigma^2 = 2\gamma k_B T$  ( $\sigma=3$  and  $\gamma=4.5$ ). The following simple form of  $\omega^D$  and  $\omega^R$  was chosen by Groot and Warren<sup>1</sup>:

$$\omega^D(r) = [\omega^R(r)]^2 = \begin{cases} (1 - r/r_c)^2 & r \leq r_c \\ 0 & r > r_c \end{cases} \quad (S6)$$

Also, the chain beads of polymers are connected by a harmonic bond:

$$F_{ij}^B = - \sum_j C^B (r_{ij} - r_{eq}) e_{ij} \quad (S7)$$

where  $C^B$  and  $r_{eq}$  denotes the bond rigidity and the equilibrium bond length, respectively. Here, the most common and reliable values ( $C^B = 4.0$  and  $r_{eq} = 0$ )<sup>1-5</sup> were adopted in our simulations.

The repulsive interaction parameters ( $a_{ij}$  in eq S3) can be estimated from the  $\chi$ -parameter in Flory-Huggins theory according to the study of Groot and Warren<sup>1</sup> as follows:

$$a_{ij} = a_{ii} + 3.27 \chi_{ij} \quad (S8)$$

**S2. Finite size effect.**

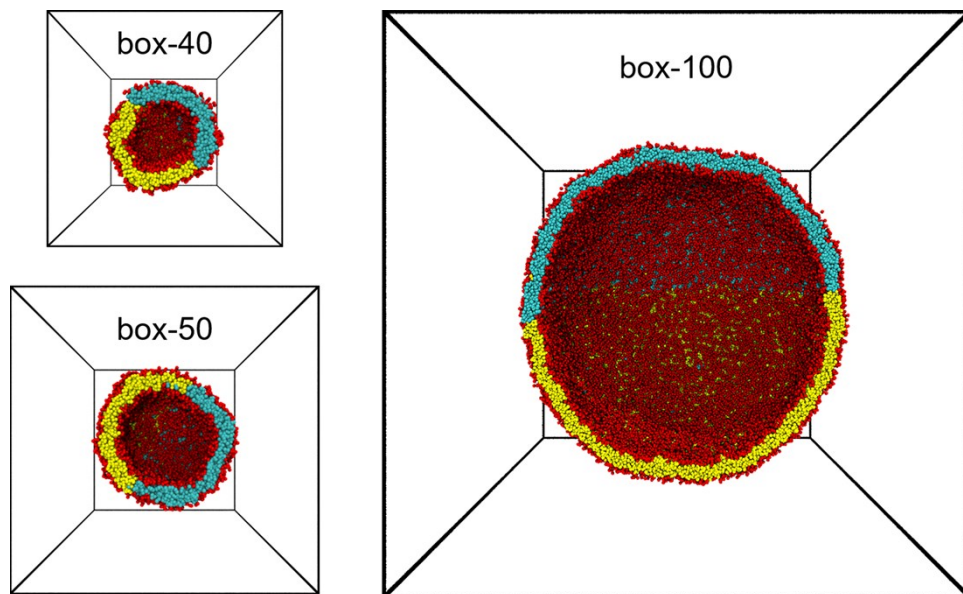

**Fig. S1.** Snapshots of Janus polymersomes obtained in different boxes sized  $(40r_c)^3$ ,  $(50r_c)^3$  and  $(100r_c)^3$ , respectively. Color code: block A, red; block B, cyan; block C, yellow.

### S3. The stability of double emulsions.

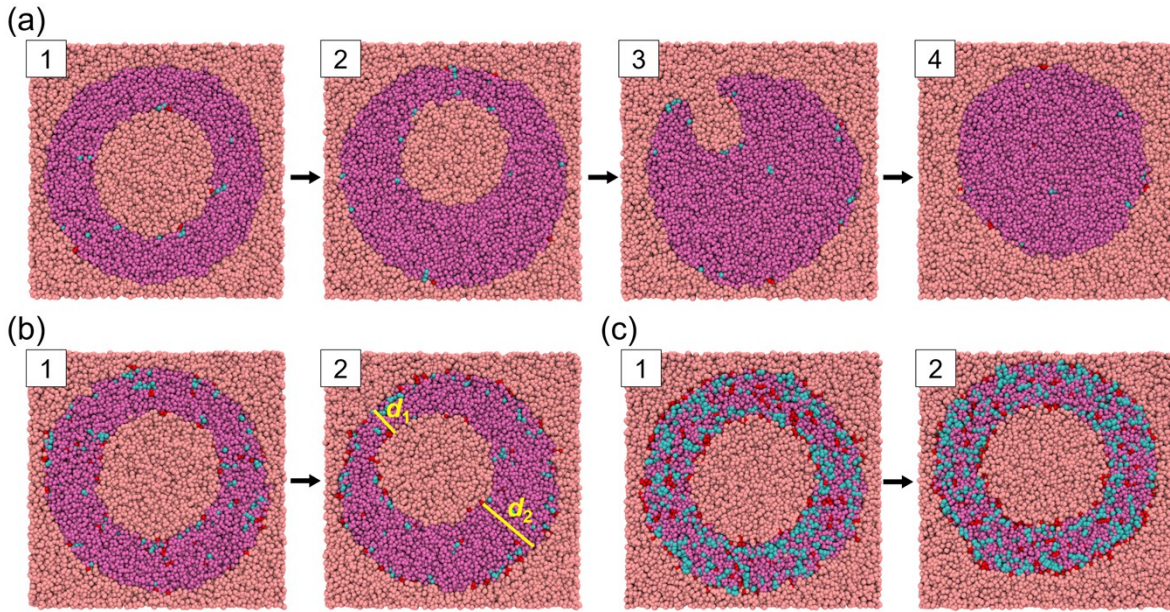

**Fig. S2.** Sequential sectional snapshots of the double emulsions with different  $A_4B_8$  diblock copolymer concentrations ( $\varphi_{\text{polymer}}$ ). (a)  $\varphi_{\text{polymer}} = 0.02$ , and the simulation times are 0,  $2.0 \times 10^5$ ,  $5.0 \times 10^5$ , and  $1.0 \times 10^6$  steps, respectively. (b)  $\varphi_{\text{polymer}} = 0.10$ , and the simulation times are 0 and  $2.0 \times 10^6$  steps.  $d_1$  and  $d_2$  are the thickness of the oil phase in different positions. (c)  $\varphi_{\text{polymer}} = 0.40$ , and the simulation times are 0 and  $2.0 \times 10^6$  steps. Color code: Water, pink; Oil, mauve; block A, red; block B, cyan.

#### S4. Dewetting of the double emulsion.

Table S1. Inner size ( $r_{in}$ ), surface area ( $A$ ) and the critical number of polymer chains ( $N_c$ ) for different double emulsions.

| $r_{in}$ | 6     | 8     | 10     | 12     | 14     | 16     |
|----------|-------|-------|--------|--------|--------|--------|
| $A$      | 452.4 | 804.2 | 1256.6 | 1809.6 | 2463.0 | 3217.0 |
| $N_c$    | 1000  | 1500  | 2500   | 3500   | 5000   | 6500   |

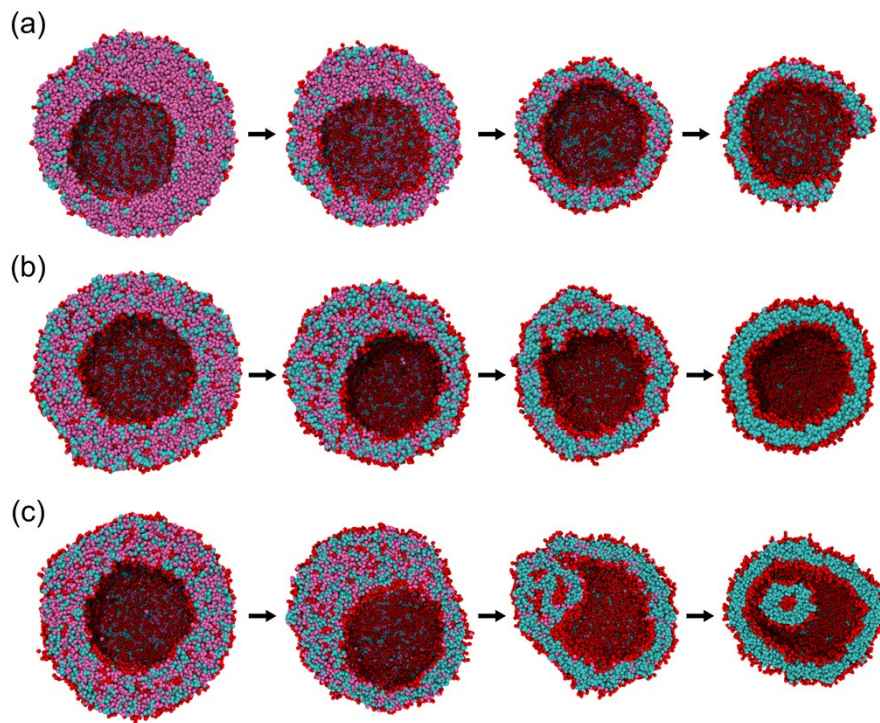

**Fig. S3.** Sequential sectional snapshots of the dewetting process with different polymer concentrations. (a)  $N_{\text{polymer}} = 2000$ , and the simulation times are 0,  $1.0 \times 10^6$ ,  $2.0 \times 10^6$ , and  $2.5 \times 10^6$  steps, respectively. (b)  $N_{\text{polymer}} = 3500$ , and the simulation times are 0,  $1.0 \times 10^6$ ,  $2.0 \times 10^6$ , and  $3.0 \times 10^6$  steps, respectively. (c)  $N_{\text{polymer}} = 4500$ , and the simulation times are 0,  $1.0 \times 10^6$ ,  $1.6 \times 10^6$ , and  $3.0 \times 10^6$  steps, respectively. Water phase are omitted for clarity. Color code: Oil, mauve; block A, red; block B, cyan.

### S5. Calculation of the degree of phase separation.

As shown in Fig. S5, the degree of phase separation ( $dps$ ) of blocks B and C is defined as<sup>6</sup>

$$dps = 1 - \frac{\langle \rho_B \rho_C \rangle}{\sqrt{\langle \rho_B^2 \rangle \langle \rho_C^2 \rangle}}$$

where  $\rho_B$  and  $\rho_C$  are the number densities of beads B and C in the spherical space with each bead B or C as the origin and  $r_{\text{cut}}$  as the cutoff radius.  $\langle \dots \rangle$  is the ensemble average.  $dps = 0$  means beads B and C mix perfectly, while  $dps = 1$  is for complete phase separation.

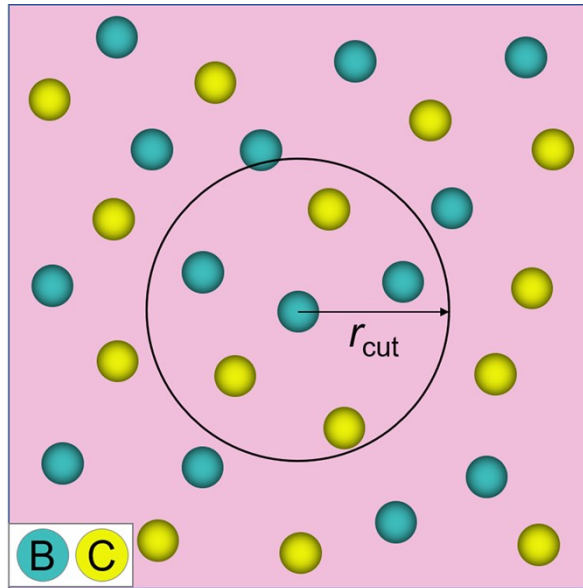

**Fig. S4.** Schematic diagram for the calculation of the degree of phase separation. Beads B and C are in cyan and yellow, respectively.



## S6. Co-assembly of AB/AC blends through double emulsion.

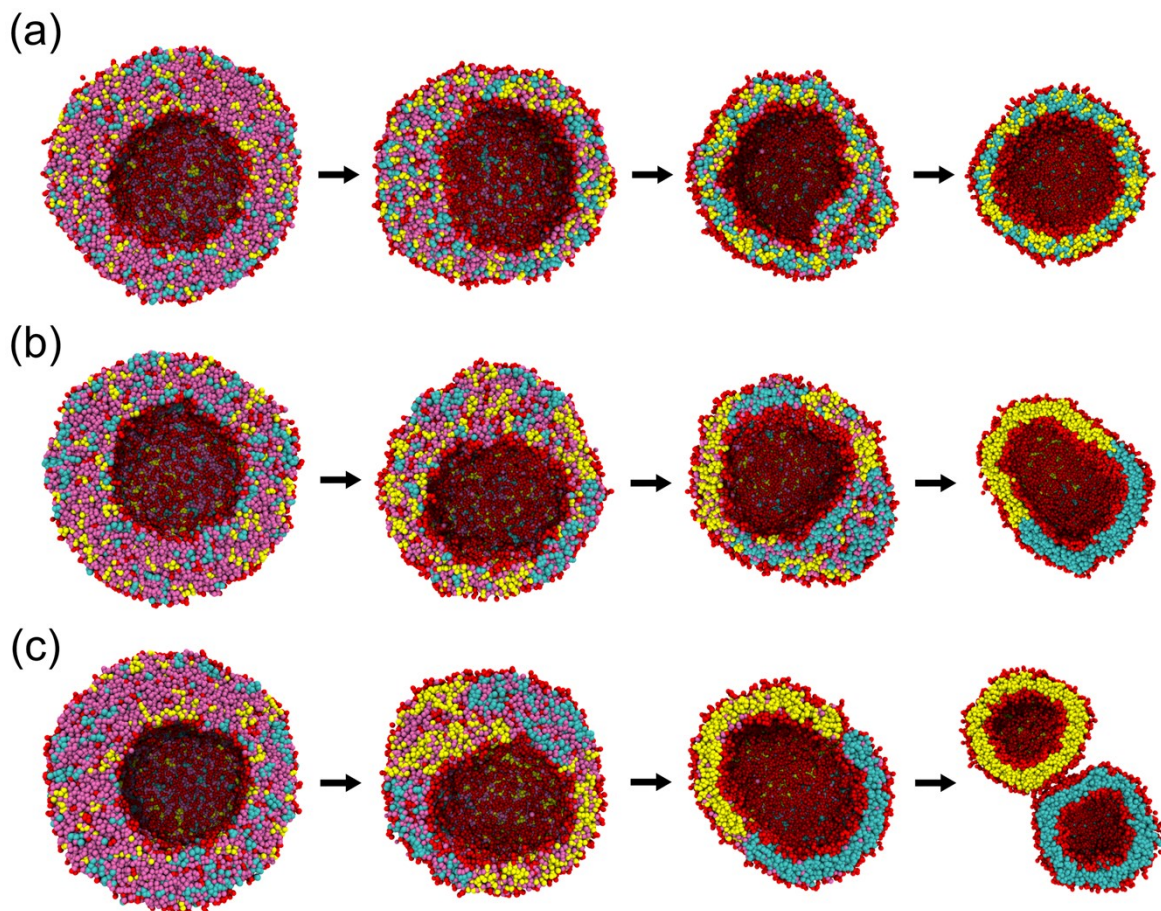

**Fig. S5.** Sequential sectional snapshots of the formation of two-component polymersomes with different values of  $a_{BC}$ . (a)  $a_{BC} = 25$ , and the simulation times are 0,  $0.8 \times 10^6$ ,  $1.2 \times 10^6$ , and  $2.0 \times 10^6$  steps, respectively. (b)  $a_{BC} = 30$ , and the simulation times are 0,  $0.8 \times 10^6$ ,  $1.2 \times 10^6$ , and  $2.0 \times 10^6$  steps, respectively. (c)  $a_{BC} = 40$ , and the simulation times are 0,  $0.8 \times 10^6$ ,  $1.2 \times 10^6$ , and  $2.0 \times 10^6$  steps, respectively. Water phase are omitted for clarity. Color code: Oil, mauve; block A, red; block B, cyan; block C, yellow.

**S7. Co-assembly of AB/AC/BC blends through double emulsion.**

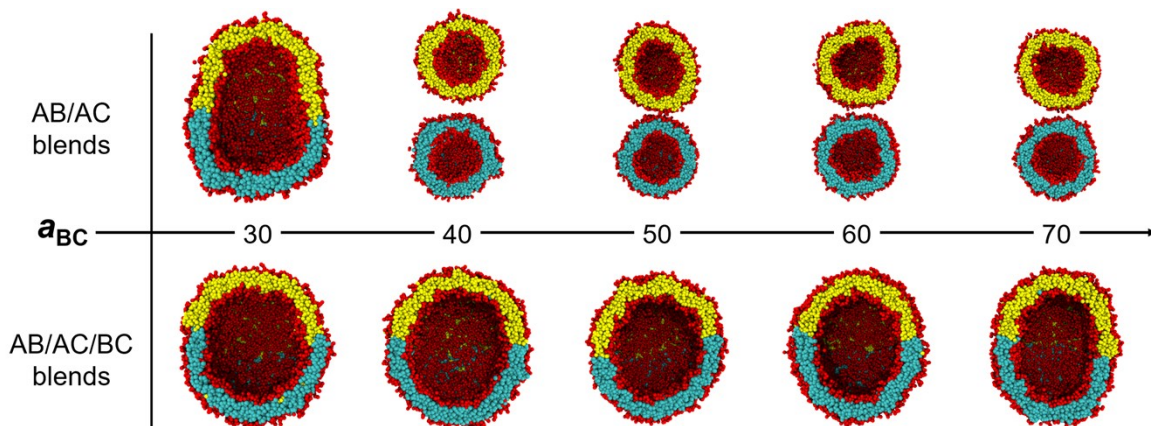

**Fig. S6.** Sectional snapshots of the vesicles obtained from AB/AC blends and AB/AC/BC blends with different values of  $a_{BC}$ . Color code: block A, red; block B, cyan; block C, yellow.

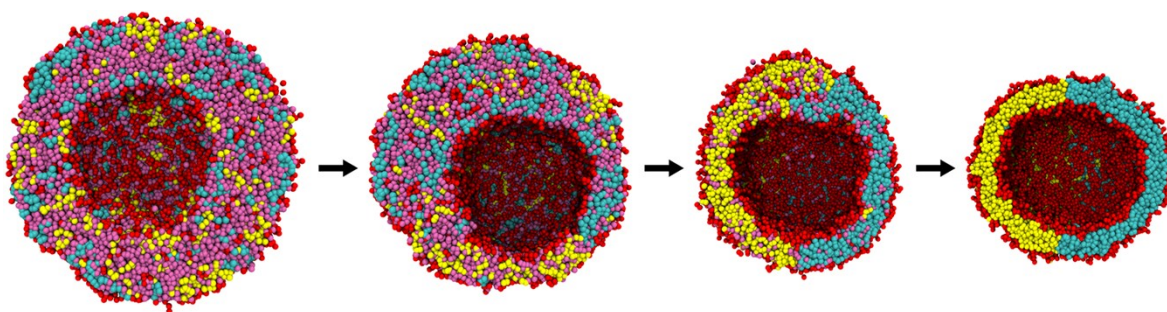

**Fig. S7.** Sequential sectional snapshots of the formation of Janus polymersome. The simulation times are 0,  $0.6 \times 10^6$ ,  $1.0 \times 10^6$ , and  $2.0 \times 10^6$  steps, respectively. Water phase are omitted for clarity. Color code: Oil, mauve; block A, red; block B, cyan; block C, yellow.

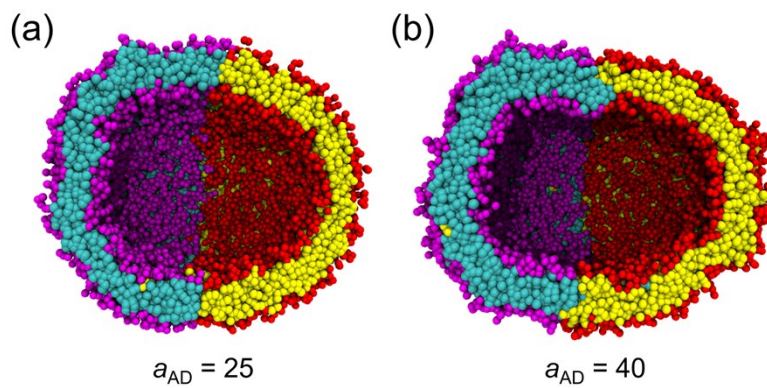

**Fig. S8.** Sectional snapshots of Janus polymersome formed through the co-assembly of AB/CD/BC blends with  $a_{AD} = 25$  (a) and  $a_{AD} = 40$  (b). Water phase are omitted for clarity. Color code: block A, red; block B, cyan; block C, yellow; block D, magenta.

**S8. Effect of the number of BC.**

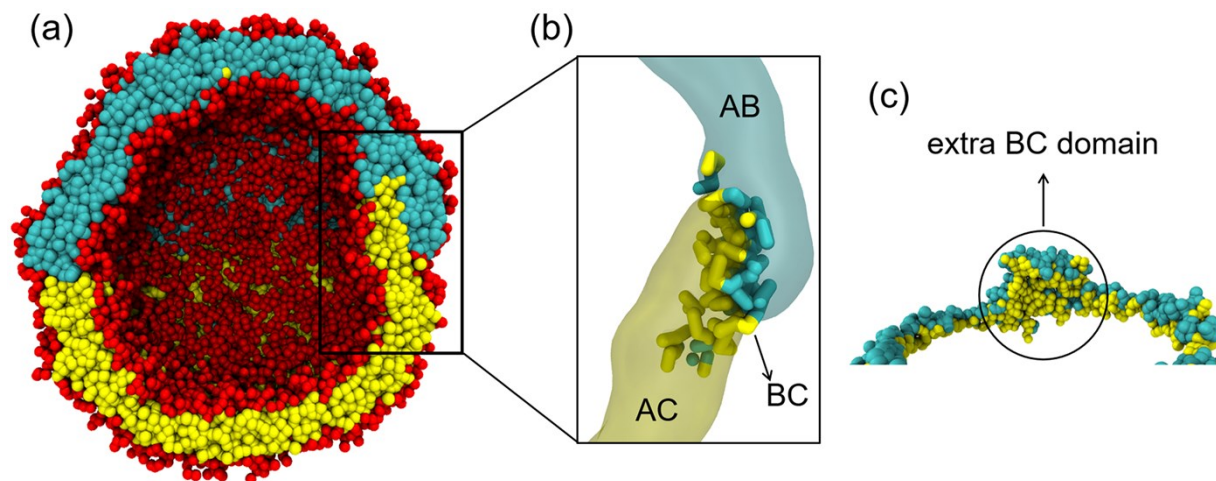

**Fig. S9.** (a) Sectional snapshot of the Janus polymersome obtained with  $N_{BC} = 285$ . (b) Enlarged detail the extra BC domain in the membrane. (c) Snapshot of the extra BC domain attached to the Janus ring. Color code: block A, red; block B, cyan; block C, yellow.

### S9. Mean-square displacement curves of polymers.

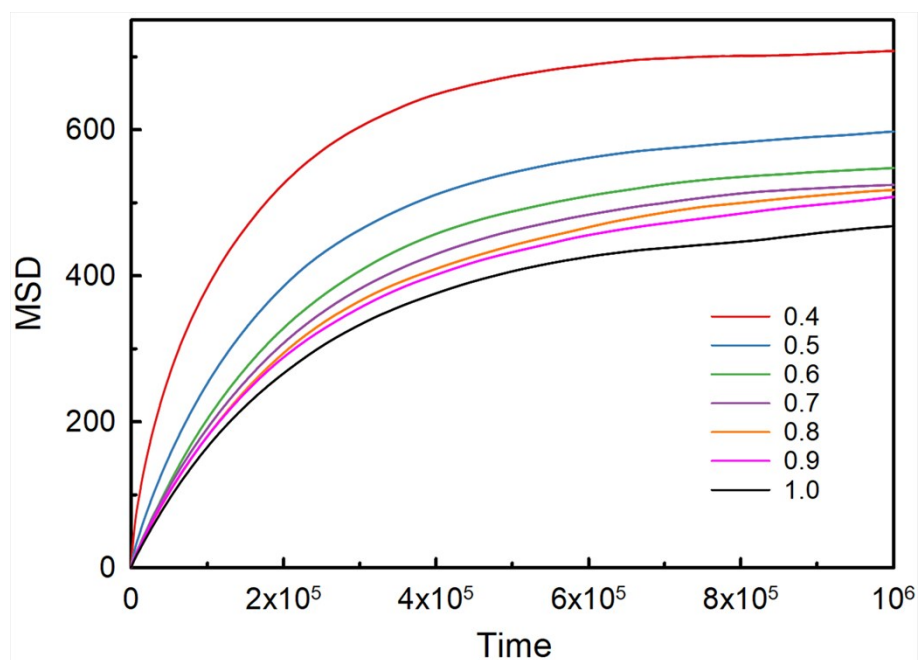

**Fig. S10.** Mean-square displacement (MSD) curves of polymers with different polymer concentrations.

## S10. References.

- (1) Groot, R. D.; Warren, P. B., Dissipative particle dynamics: Bridging the gap between atomistic and mesoscopic simulation. *J. Chem. Phys.* **1997**, *107*, 4423-4435.
- (2) Groot, R. D.; Rabone, K., Mesoscopic simulation of cell membrane damage, morphology change and rupture by nonionic surfactants. *Biophys. J.* **2001**, *81*, 725-736.
- (3) Posel, Z.; Limpouchova, Z.; Sindelka, K.; Lisal, M.; Prochazka, K., Dissipative particle dynamics study of the ph-dependent behavior of poly (2-vinylpyridine)-block-poly (ethylene oxide) diblock copolymer in aqueous buffers. *Macromolecules* **2014**, *47*, 2503-2514.
- (4) Goel, H.; Chandran, P. R.; Mitra, K.; Majumdar, S.; Ray, P., Estimation of interfacial tension for immiscible and partially miscible liquid systems by Dissipative Particle Dynamics. *Chem. Phys. Lett.* **2014**, *600*, 62-67.
- (5) Rezaei, H.; Amjad-Iranagh, S.; Modarress, H., Self-Accumulation of Uncharged Polyaromatic Surfactants at Crude Oil–Water Interface: A Mesoscopic DPD Study. *Energy & Fuels* **2016**, *30*, 6626-6639.
- (6) Lin, Y. J.; Jiménez-García, K.; Spielman, I. B., Spin–orbit-coupled Bose–Einstein condensates. *Nature* **2011**, *471*, 83-86.
